# Supplementary material
Source: bioRxiv or medRxiv preprint supplement (http://medrxiv.org/highwire/filestream/80568/field_highwire_adjunct_files/2/2020.04.30.20086884-3.pdf)
Supplement: Supplementary file [file 2020.04.30.20086884-3.pdf]

| Jurisdiction   | Cumulative deaths | Jurisdiction         | Cumulative deaths |
|----------------|-------------------|----------------------|-------------------|
| California     | 2807              | Kentucky             | 428               |
| Texas          | 1270              | Oregon               | 154               |
| Florida        | 2047              | Oklahoma             | 320               |
| New York       | 64173             | Connecticut          | 5047              |
| Pennsylvania   | 6008              | Iowa                 | 316               |
| Illinois       | 3707              | Utah                 | 71                |
| Ohio           | 1842              | Nevada               | 399               |
| Georgia        | 1681              | Arkansas             | 101               |
| North Carolina | 975               | Mississippi          | 534               |
| Michigan       | 5779              | Kansas               | 297               |
| New Jersey     | 15075             | New Mexico           | 238               |
| Virginia       | 1059              | Nebraska             | 99                |
| Washington     | 1124              | West Virginia        | 145               |
| Arizona        | 459               | Idaho                | 101               |
| Massachusetts  | 8346              | Hawaii               | 23                |
| Tennessee      | 333               | New Hampshire        | 125               |
| Indiana        | 1599              | Maine                | 85                |
| Missouri       | 522               | Montana              | 17                |
| Maryland       | 2848              | Rhode Island         | 556               |
| Wisconsin      | 644               | Delaware             | 221               |
| Colorado       | 1204              | South Dakota         | 89                |
| Minnesota      | 692               | North Dakota         | 31                |
| South Carolina | 256               | Alaska               | 15                |
| Alabama        | 479               | District of Columbia | 321               |
| Louisiana      | 2961              | Vermont              | 114               |
|                |                   | Wyoming              | 16                |

**S4 Table Final number of deaths for all states.** The predicted deaths for all states shows significant variability across states.
